# Supplementary material for: Oligomeric procyanidins inhibit insulin fibrillation by forming unstructured and off-pathway aggregates
Source: Royal Society of Chemistry journal article supplement (doi:10.1039/d1ra05397c), 2021-01-01
Supplement: d1ra05397c1.pdf [file d1ra05397c1.pdf]

## Supplementary Information

### **Oligomeric Procyanidins Inhibit Insulin Fibrillation by Forming Unstructured and Off-Pathway Aggregates**

Shaohuang Chen,<sup>a†</sup> Huiting Yin,<sup>a†</sup> Lei Zhang,<sup>a</sup> Rui Liu,<sup>b\*</sup> Wei Qi,<sup>a</sup> Zhimin He<sup>a</sup> and Rongxin Su<sup>\*ac</sup>

*<sup>a</sup>State Key Laboratory of Chemical Engineering, Tianjin Key Laboratory of Membrane Science and Desalination Technology, School of Chemical Engineering and Technology, Tianjin University, Tianjin 300072, China. E-Mail: surx@tju.edu.cn (R. Su).*

*<sup>b</sup>State Key Laboratory of Food Nutrition and Safety, Tianjin University of Science & Technology, Tianjin 300457, China. E-Mail: lr@tust.edu.cn (R. Liu)*

*<sup>c</sup>School of Marine Science and Technology, Tianjin University, Tianjin 300072, China.*

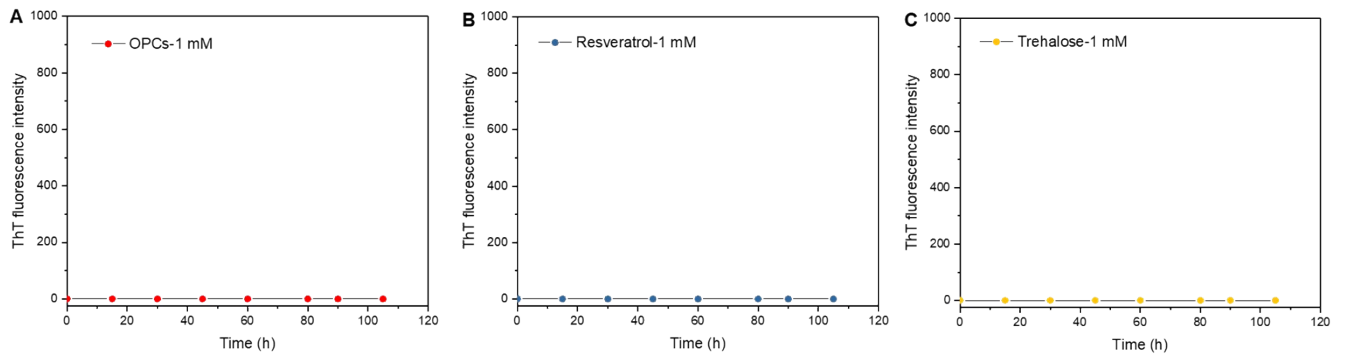

Fig. S1. ThT fluorescence intensity of (A) OPCs, (B) resveratrol, and (C) trehalose in the absence of NaCl.

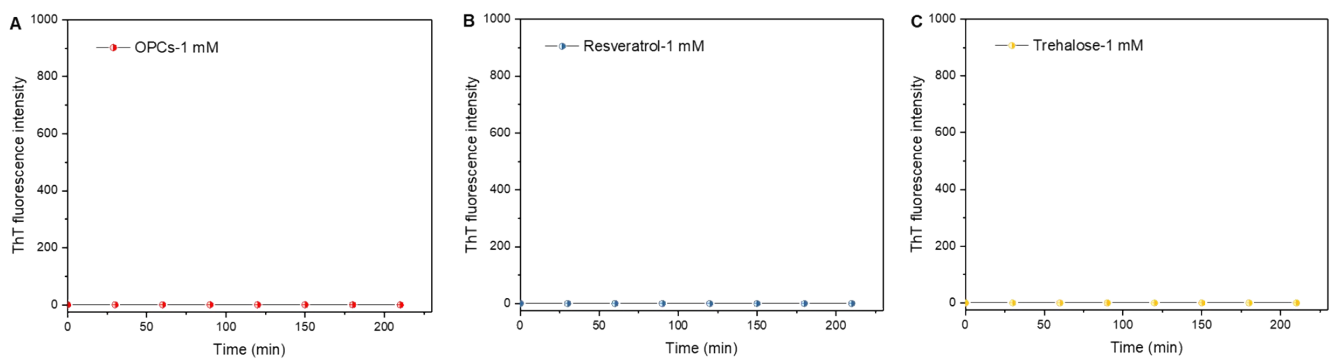

Fig. S2. ThT fluorescence intensity of (A) OPCs, (B) resveratrol, and (C) trehalose in the presence of 100 mM NaCl.

**Table S1.** Effects of OPCs, resveratrol, and trehalose on the kinetic parameters of insulin fibrillation in the absence of 100 mM NaCl.

|                              | <b>Fibril Formation<sup>b</sup></b> |                    |                              |                                  |
|------------------------------|-------------------------------------|--------------------|------------------------------|----------------------------------|
|                              | <b>Lag time (h)</b>                 | <b>Growth rate</b> | <b>Intensity<sup>c</sup></b> | <b>Amyloidogenic<sup>d</sup></b> |
| <b>Insulin</b>               | 43.2 ± 7.9                          | 34.8 ± 0.6         | 701.8 ± 127.3                | +++                              |
| <b>Insulin + OPCs</b>        |                                     |                    |                              |                                  |
| <b>100 μM</b>                | 67.0 ± 2.0                          | 3.9 ± 0.1          | 155.2 ± 5.7                  | +                                |
| <b>500 μM</b>                | NA <sup>e</sup>                     | NA                 | NA                           | --                               |
| <b>1 mM</b>                  | NA                                  | NA                 | NA                           | --                               |
| <b>Insulin + resveratrol</b> |                                     |                    |                              |                                  |
| <b>100 μM</b>                | 43.2 ± 9.6                          | 30.0 ± 0.4         | 634.2 ± 149.1                | +++                              |
| <b>500 μM</b>                | 48.5 ± 10.9                         | 16.0 ± 0.2         | 356.1 ± 69.3                 | ++                               |
| <b>1 mM</b>                  | 45.3 ± 2.8                          | 15.2 ± 0.2         | 368.3 ± 21.9                 | ++                               |
| <b>Insulin + trehalose</b>   |                                     |                    |                              |                                  |
| <b>100 μM</b>                | 38.6 ± 8.9                          | 37.5 ± 0.9         | 635.9 ± 44.5                 | +++                              |
| <b>1 mM</b>                  | 39.9 ± 2.0                          | 25.0 ± 0.3         | 576.2 ± 25.0                 | +++                              |

<sup>a</sup>All assays were repeated 10 times. <sup>b</sup>The concentration of bovine insulin was 2 mg/mL. <sup>c</sup>The fluorescence intensity of insulin alone was set as reference value. <sup>d</sup>Semi-quantitative analysis of ThT fluorescence-based amyloid formation: +++ designates samples with fluorescence intensity >75% of insulin intensity; ++, values between 50% and 75% insulin intensity; +, values between 20% and 50% insulin intensity; and --, values <20% of insulin intensity. Note: ThT fluorescence data were obtained strictly according to the experimental protocol in this work. <sup>e</sup>Data are not available, in that the weak ThT intensity data cannot get a good fit with the kinetic equation.

**Table S2.** Effects of OPCs, resveratrol, and trehalose on the kinetic parameters of insulin fibrillation in the presence of 100 mM NaCl.

|                              | <b>Fibril Formation<sup>b</sup></b> |                    |                              |                                  |
|------------------------------|-------------------------------------|--------------------|------------------------------|----------------------------------|
|                              | <b>Lag time (min)</b>               | <b>Growth rate</b> | <b>Intensity<sup>c</sup></b> | <b>Amyloidogenic<sup>d</sup></b> |
| <b>Insulin</b>               | 59.1 ± 5.7                          | 27.6 ± 0.3         | 797.0 ± 81.4                 | +++                              |
| <b>Insulin + OPCs</b>        |                                     |                    |                              |                                  |
| <b>100 μM</b>                | 62.9 ± 10.6                         | 11.4 ± 0.1         | 400.7 ± 58.4                 | ++                               |
| <b>500 μM</b>                | 95.0 ± 8.3                          | 3.7 ± 0.1          | 128.5 ± 13.3                 | +                                |
| <b>1 mM</b>                  | 119.0 ± 1.1                         | 2.7 ± 0.1          | 100.7 ± 1.3                  | +                                |
| <b>Insulin + resveratrol</b> |                                     |                    |                              |                                  |
| <b>100 μM</b>                | 61.1 ± 4.3                          | 17.5 ± 0.3         | 427.6 ± 32.9                 | ++                               |
| <b>500 μM</b>                | 53.2 ± 5.9                          | 8.4 ± 0.1          | 303.9 ± 25.9                 | +                                |
| <b>1 mM</b>                  | 53.6 ± 7.8                          | 5.27 ± 0.1         | 325.1 ± 28.3                 | +                                |
| <b>Insulin + trehalose</b>   |                                     |                    |                              |                                  |
| <b>100 μM</b>                | 33.3 ± 8.4                          | 17.3 ± 0.2         | 472.9 ± 85.6                 | ++                               |
| <b>1 mM</b>                  | 41.9 ± 8.6                          | 17.3 ± 0.1         | 609.6 ± 84.9                 | +++                              |

<sup>a</sup>All assays were repeated 10 times. <sup>b</sup>The concentration of bovine insulin was 2 mg/mL. <sup>c</sup>The fluorescence intensity of insulin alone was set as reference value. <sup>d</sup>Semi-quantitative analysis of ThT fluorescence-based amyloid formation: +++ designates samples with fluorescence intensity >75% of insulin intensity; ++, values between 50% and 75% insulin intensity; +, values between 20% and 50% insulin intensity; and --, values <20% of insulin intensity. Note: ThT fluorescence data were obtained strictly according to the experimental protocol in this work.

**Table S3.** Secondary structure contents of insulin incubated with different compounds in the presence of 100 mM NaCl.

| Samples                      | Time (min) | Secondary structure |                 |               |        |
|------------------------------|------------|---------------------|-----------------|---------------|--------|
|                              |            | $\alpha$ -helix     | $\beta$ -strand | $\beta$ -turn | Others |
| <b>Insulin</b>               | <b>0</b>   | 60.2%               | 11.3%           | 9.1%          | 19.3%  |
|                              | <b>60</b>  | 28.8%               | 11.6%           | 14%           | 45.6%  |
|                              | <b>150</b> | 0                   | 37.9%           | 23.3%         | 38.9%  |
| <b>Insulin + OPCs</b>        | <b>0</b>   | 60.2%               | 11.3%           | 9.1%          | 19.3%  |
|                              | <b>60</b>  | 16.8%               | 8.8%            | 7.5%          | 67.1%  |
|                              | <b>150</b> | 0                   | 30.2%           | 20.6%         | 49.2%  |
| <b>Insulin + resveratrol</b> | <b>0</b>   | 60.2%               | 11.3%           | 9.1%          | 19.3%  |
|                              | <b>60</b>  | 11.2%               | 23%             | 14.4%         | 51.3%  |
|                              | <b>150</b> | 0                   | 24.8%           | 18.3%         | 56.9%  |
| <b>Insulin + trehalose</b>   | <b>0</b>   | 60.2%               | 11.3%           | 9.1%          | 19.3%  |
|                              | <b>150</b> | 0                   | 36.9%           | 18.4%         | 44.7%  |

**Table S4.** Secondary structure contents of insulin in the absence or presence of 100 mM NaCl.

| Samples                                          | Secondary structure |                 |               |        |
|--------------------------------------------------|---------------------|-----------------|---------------|--------|
|                                                  | $\alpha$ -helix     | $\beta$ -strand | $\beta$ -turn | Others |
| <b>Insulin (45 h, without NaCl) <sup>a</sup></b> | 35.7%               | 13.8%           | 12.2%         | 38.3%  |
| <b>Insulin (60 min, with NaCl)</b>               | 28.8%               | 11.6%           | 14.0%         | 45.6%  |

<sup>a</sup>Data obtained from our previous work<sup>1</sup> is re-calculated using the BestSel server.

## Reference

- 1 R. Liu, R. X. Su, W. Qi and Z. M. He, *Biochem. Biophys. Res. Commun.*, 2011, **409**, 229-234.
